# Supplementary material for: The maca protein ameliorates DSS-induced colitis in mice by modulating the gut microbiota and production of SCFAs
Source: Royal Society of Chemistry journal article supplement (doi:10.1039/d3fo03654e), 2023-01-01
Supplement: d3fo03654e1.pdf [file d3fo03654e1.pdf]

## Electronic Supplementary Information

(For raw data used to generate the experimental results)

Table S5 The weight of mice in Day 1-14

| Date       | Days | Average weight $\pm$ SD (n=8, g) |                  |                  |                  |                  |
|------------|------|----------------------------------|------------------|------------------|------------------|------------------|
|            |      | N group                          | D group          | MP group         | MPD group        | DMP group        |
| 2022.05.27 | 1    | 22.71 $\pm$ 0.70                 | 23.20 $\pm$ 0.26 | 23.42 $\pm$ 0.58 | 22.80 $\pm$ 0.36 | 22.77 $\pm$ 0.45 |
| 2022.05.28 | 2    | 22.93 $\pm$ 1.07                 | 23.50 $\pm$ 0.92 | 23.83 $\pm$ 0.93 | 22.97 $\pm$ 1.35 | 22.96 $\pm$ 0.86 |
| 2022.05.29 | 3    | 22.93 $\pm$ 0.40                 | 23.75 $\pm$ 0.40 | 23.98 $\pm$ 0.22 | 23.10 $\pm$ 0.85 | 23.43 $\pm$ 0.70 |
| 2022.05.30 | 4    | 23.02 $\pm$ 1.13                 | 23.87 $\pm$ 0.23 | 24.13 $\pm$ 0.41 | 23.21 $\pm$ 0.50 | 23.58 $\pm$ 0.44 |
| 2022.06.01 | 5    | 23.13 $\pm$ 0.76                 | 24.02 $\pm$ 0.87 | 24.25 $\pm$ 0.43 | 23.27 $\pm$ 0.97 | 23.74 $\pm$ 0.26 |
| 2022.06.02 | 6    | 23.18 $\pm$ 1.05                 | 24.34 $\pm$ 1.07 | 24.57 $\pm$ 0.73 | 23.40 $\pm$ 1.07 | 24.06 $\pm$ 0.67 |
| 2022.06.03 | 7    | 23.32 $\pm$ 0.25                 | 24.50 $\pm$ 0.43 | 24.62 $\pm$ 0.88 | 23.61 $\pm$ 0.40 | 24.22 $\pm$ 0.87 |
| 2022.06.04 | 8    | 23.41 $\pm$ 0.56                 | 24.57 $\pm$ 0.27 | 24.73 $\pm$ 0.68 | 23.70 $\pm$ 0.48 | 24.33 $\pm$ 0.59 |
| 2022.06.05 | 9    | 23.52 $\pm$ 0.60                 | 24.65 $\pm$ 1.08 | 24.81 $\pm$ 0.65 | 23.89 $\pm$ 0.67 | 24.36 $\pm$ 0.97 |
| 2022.06.06 | 10   | 23.60 $\pm$ 0.72                 | 24.07 $\pm$ 0.38 | 24.99 $\pm$ 0.89 | 23.72 $\pm$ 1.15 | 24.40 $\pm$ 0.95 |
| 2022.06.07 | 11   | 23.64 $\pm$ 0.49                 | 23.57 $\pm$ 0.97 | 25.04 $\pm$ 0.94 | 23.33 $\pm$ 0.86 | 23.85 $\pm$ 1.17 |
| 2022.06.08 | 12   | 23.79 $\pm$ 0.35                 | 21.03 $\pm$ 0.83 | 25.07 $\pm$ 0.37 | 22.95 $\pm$ 1.35 | 22.83 $\pm$ 0.90 |
| 2022.06.09 | 13   | 23.86 $\pm$ 0.42                 | 20.42 $\pm$ 0.90 | 25.38 $\pm$ 0.74 | 22.52 $\pm$ 1.39 | 22.33 $\pm$ 1.61 |
| 2022.06.10 | 14   | 24.19 $\pm$ 0.27                 | 20.30 $\pm$ 0.46 | 25.12 $\pm$ 0.35 | 22.64 $\pm$ 0.30 | 22.09 $\pm$ 0.96 |

**Table S6** The daily food intake of mice in Day 1-14

| Date       | Days | Average daily food intake of mice $\pm$ SD (n=8, g) |                 |                  |                 |                 |
|------------|------|-----------------------------------------------------|-----------------|------------------|-----------------|-----------------|
|            |      | N group                                             | D group         | MP group         | MPD group       | DMP group       |
| 2022.05.27 | 1    | 3.42 $\pm$ 0.31                                     | 3.62 $\pm$ 0.11 | 4.02 $\pm$ 0.25  | 3.75 $\pm$ 0.16 | 3.95 $\pm$ 0.20 |
| 2022.05.28 | 2    | 3.24 $\pm$ 0.47                                     | 3.56 $\pm$ 0.40 | 3.75 $\pm$ 0.40  | 3.56 $\pm$ 0.59 | 3.54 $\pm$ 0.18 |
| 2022.05.29 | 3    | 3.45 $\pm$ 0.174                                    | 3.72 $\pm$ 0.17 | 4.02 $\pm$ 0.10  | 3.38 $\pm$ 0.37 | 3.58 $\pm$ 0.21 |
| 2022.05.30 | 4    | 3.30 $\pm$ 0.198                                    | 3.55 $\pm$ 0.10 | 3.83 $\pm$ 0.17  | 3.15 $\pm$ 0.22 | 3.35 $\pm$ 0.19 |
| 2022.06.01 | 5    | 3.45 $\pm$ 0.336                                    | 3.28 $\pm$ 0.38 | 4.23 $\pm$ 0.18  | 3.58 $\pm$ 0.13 | 3.68 $\pm$ 0.11 |
| 2022.06.02 | 6    | 3.50 $\pm$ 0.16                                     | 3.56 $\pm$ 0.26 | 4.15 $\pm$ 0.31  | 3.48 $\pm$ 0.27 | 3.76 $\pm$ 0.30 |
| 2022.06.03 | 7    | 3.32 $\pm$ 0.11                                     | 3.75 $\pm$ 0.18 | 3.98 $\pm$ 0.37  | 3.37 $\pm$ 0.17 | 3.6 $\pm$ 0.38  |
| 2022.06.04 | 8    | 3.63 $\pm$ 0.25                                     | 3.27 $\pm$ 0.12 | 3.84 $\pm$ 0.29  | 3.45 $\pm$ 0.21 | 3.42 $\pm$ 0.26 |
| 2022.06.05 | 9    | 3.68 $\pm$ 0.26                                     | 3.39 $\pm$ 0.26 | 4.24 $\pm$ 0.276 | 3.37 $\pm$ 0.30 | 3.35 $\pm$ 0.23 |
| 2022.06.06 | 10   | 3.6 $\pm$ 0.32                                      | 2.85 $\pm$ 0.16 | 4.15 $\pm$ 0.38  | 3.28 $\pm$ 0.21 | 2.97 $\pm$ 0.22 |
| 2022.06.07 | 11   | 3.52 $\pm$ 0.22                                     | 2.38 $\pm$ 0.42 | 4.23 $\pm$ 0.40  | 2.85 $\pm$ 0.38 | 2.47 $\pm$ 0.21 |
| 2022.06.08 | 12   | 3.72 $\pm$ 0.16                                     | 1.86 $\pm$ 0.36 | 3.98 $\pm$ 0.16  | 2.67 $\pm$ 0.29 | 2.35 $\pm$ 0.20 |
| 2022.06.09 | 13   | 3.32 $\pm$ 0.19                                     | 1.53 $\pm$ 0.39 | 4.34 $\pm$ 0.32  | 2.4 $\pm$ 0.61  | 2.58 $\pm$ 0.21 |
| 2022.06.10 | 14   | 3.84 $\pm$ 0.12                                     | 1.62 $\pm$ 0.20 | 3.92 $\pm$ 0.15  | 2.58 $\pm$ 0.13 | 2.35 $\pm$ 0.42 |

**Table S7** The DAI score of mice in Day 1-14

| Date       | Days | Average DAI score of mice $\pm$ SD (n=8, g) |               |                |               |                |
|------------|------|---------------------------------------------|---------------|----------------|---------------|----------------|
|            |      | N group                                     | D group       | MP group       | MPD group     | DMP group      |
| 2022.05.27 | 1    | 0                                           | 0             | 0              | 0             | 0              |
| 2022.05.28 | 2    | 0                                           | 0             | 0              | 0             | 0              |
| 2022.05.29 | 3    | 0                                           | 0             | 0              | 0             | 0              |
| 2022.05.30 | 4    | 0                                           | 0             | 0              | 0             | 0              |
| 2022.06.01 | 5    | 0                                           | 0             | 0              | 0             | 0              |
| 2022.06.02 | 6    | 0                                           | 0             | 0              | 0             | 0              |
| 2022.06.03 | 7    | 0                                           | 0.6 $\pm$ 0.2 | 0              | 0.6 $\pm$ 0.2 | 0.5 $\pm$ 0.2  |
| 2022.06.04 | 8    | 0                                           | 0.8 $\pm$ 0.3 | 0              | 0.8 $\pm$ 0.2 | 0.8 $\pm$ 0.3  |
| 2022.06.05 | 9    | 0                                           | 3.8 $\pm$ 0.5 | 0              | 2.2 $\pm$ 0.5 | 2.4 $\pm$ 0.5  |
| 2022.06.06 | 10   | 0.1                                         | 5.2 $\pm$ 1.0 | 0.1            | 2.8 $\pm$ 0.4 | 3.2 $\pm$ 0.6  |
| 2022.06.07 | 11   | 0.2 $\pm$ 0.05                              | 7.7 $\pm$ 0.5 | 0.2 $\pm$ 0.05 | 2.6 $\pm$ 0.7 | 4.8 $\pm$ 0.5  |
| 2022.06.08 | 12   | 0.1 $\pm$ 0.05                              | 8.0 $\pm$ 0.7 | 0.1 $\pm$ 0.05 | 3.0 $\pm$ 0.8 | 5.0 $\pm$ 1.0  |
| 2022.06.09 | 13   | 0                                           | 9.2 $\pm$ 1.0 | 0              | 3.5 $\pm$ 0.5 | 5.2 $\pm$ 0.75 |
| 2022.06.10 | 14   | 0                                           | 9.5 $\pm$ 0.5 | 0              | 3.7 $\pm$ 0.7 | 5.7 $\pm$ 0.5  |

**Table S8** The colon length of mice in Day 14

| N group | colon length(cm) | D  | colon length(cm) | MP  | colon length(cm) | MPD  | colon length(cm) | DMP  | colon length(cm) |
|---------|------------------|----|------------------|-----|------------------|------|------------------|------|------------------|
| N1      | 7.4              | D1 | 6.3              | MP1 | 7.5              | MPD1 | 8.1              | DMP1 | 7.3              |
| N2      | 7.9              | D2 | 7.5              | MP2 | 8.6              | MPD2 | 7.4              | DMP2 | 8.3              |
| N3      | 8.2              | D3 | 7.2              | MP3 | 9.4              | MPD3 | 7.5              | DMP3 | 7.3              |
| N4      | 8.2              | D4 | 6.3              | MP4 | 7.6              | MPD4 | 7.4              | DMP4 | 6.7              |
| N5      | 7.3              | D5 | 7.4              | MP5 | 7.8              | MPD5 | 7.6              | DMP5 | 7.2              |
| N6      | 8.1              | D6 | 7.4              | MP6 | 7.2              | MPD6 | 7.8              | DMP6 | 7.5              |
| N7      | 9.8              | D7 | 6.9              | MP7 | 7.6              | MPD7 | 6.8              | DMP7 | 7.2              |
| N8      | 7.8              | D8 | 7.5              | MP8 | 7.5              | MPD8 | 7.4              | DMP8 | 6.7              |

**Table S9** Histopathological score of colon in mice

| Group | Inflammation | Epithelium | Glands | Depth of lesion | Extent of section affected |
|-------|--------------|------------|--------|-----------------|----------------------------|
| N1    | 0            | 0          | 0      | 0               | 0                          |
| N2    | 0            | 0          | 0      | 0               | 0                          |
| N3    | 0            | 0          | 0      | 0               | 0                          |
| N4    | 0            | 0          | 0      | 0               | 0                          |
| N5    | 0            | 0          | 0      | 0               | 0                          |
| N6    | 0            | 0          | 0      | 0               | 0                          |
| N7    | 0            | 0          | 0      | 0               | 0                          |
| N8    | 0            | 0          | 0      | 0               | 0                          |
| D1    | 2            | 1          | 2      | 2               | 4                          |
| D2    | 4            | 1          | 2      | 2               | 4                          |
| D3    | 2            | 1          | 2      | 2               | 4                          |
| D4    | 3            | 1          | 3      | 2               | 4                          |
| D5    | 2            | 1          | 2      | 2               | 4                          |
| D6    | 3            | 1          | 1      | 2               | 4                          |
| D7    | 3            | 1          | 2      | 2               | 4                          |
| D8    | 3            | 1          | 1      | 2               | 4                          |
| MP1   | 0            | 0          | 0      | 0               | 0                          |
| MP2   | 0            | 0          | 0      | 0               | 0                          |
| MP3   | 0            | 0          | 0      | 0               | 0                          |
| MP4   | 0            | 0          | 0      | 0               | 0                          |
| MP5   | 0            | 0          | 0      | 0               | 0                          |
| MP6   | 0            | 0          | 0      | 0               | 0                          |
| MP7   | 0            | 0          | 0      | 0               | 0                          |
| MP8   | 0            | 0          | 0      | 0               | 0                          |
| MPD1  | 0            | 0          | 0      | 0               | 0                          |
| MPD2  | 1            | 1          | 0      | 1               | 2                          |
| MPD3  | 0            | 0          | 0      | 0               | 0                          |
| MPD4  | 1            | 1          | 0      | 1               | 2                          |
| MPD5  | 0            | 0          | 0      | 0               | 0                          |
| MPD6  | 1            | 0          | 1      | 1               | 0                          |
| MPD7  | 1            | 0          | 1      | 0               | 0                          |
| MPD8  | 1            | 1          | 0      | 1               | 1                          |
| DMP1  | 2            | 1          | 1      | 1               | 2                          |
| DMP2  | 0            | 0          | 0      | 0               | 0                          |
| DMP3  | 0            | 0          | 0      | 0               | 0                          |
| DMP4  | 1            | 1          | 0      | 1               | 0                          |
| DMP5  | 0            | 1          | 0      | 0               | 1                          |
| DMP6  | 1            | 0          | 0      | 0               | 2                          |
| DMP7  | 1            | 0          | 0      | 0               | 2                          |
| DMP8  | 0            | 1          | 0      | 0               | 2                          |

**Table S10** The number of goblet cells in mice

| Group | The number of goblet cells |
|-------|----------------------------|
| N1    | 690                        |
| N2    | 870                        |
| N3    | 960                        |
| N4    | 810                        |
| N5    | 780                        |
| N6    | 960                        |
| N7    | 1180                       |
| N8    | 840                        |
| D1    | 750                        |
| D2    | 900                        |
| D3    | 600                        |
| D4    | 480                        |
| D5    | 460                        |
| D6    | 510                        |
| D7    | 470                        |
| D8    | 580                        |
| MP1   | 980                        |
| MP2   | 980                        |
| MP3   | 930                        |
| MP4   | 870                        |
| MP5   | 2580                       |
| MP6   | 1130                       |
| MP7   | 1290                       |
| MP8   | 1350                       |
| MPD1  | 660                        |
| MPD2  | 590                        |
| MPD3  | 680                        |
| MPD4  | 680                        |
| MPD5  | 780                        |
| MPD6  | 630                        |
| MPD7  | 750                        |
| MPD8  | 710                        |
| DMP1  | 650                        |
| DMP2  | 840                        |
| DMP3  | 840                        |
| DMP4  | 760                        |
| DMP5  | 950                        |
| DMP6  | 720                        |
| DMP7  | 480                        |
| DMP8  | 910                        |

**Table S11** The inflammatory cytokines in colon tissues and IgA concentrations of mice

| Group | IL-6 (Pg/100mg tissue) | TNF- $\alpha$ (Pg/100mg tissue) | IL-17 (Pg/100mg tissue) | IL-10 (Pg/100mg tissue) | IgA in serum (Pg/100mL) | IgA in colon (Pg/100mg tissue) |
|-------|------------------------|---------------------------------|-------------------------|-------------------------|-------------------------|--------------------------------|
| N1    | 242.061                | 132.648                         | 290.452                 | 232.590                 | 48.333                  | 272.3333                       |
| N2    | 199.725                | 178.379                         | 244.724                 | 268.816                 | 42.049                  | 276.0486                       |
| N3    | 190.291                | 166.240                         | 297.259                 | 298.634                 | 47.333                  | 257.3333                       |
| N4    | 199.778                | 171.897                         | 223.619                 | 279.137                 | 43.259                  | 260.259                        |
| N5    | 218.440                | 207.832                         | 230.103                 | 265.468                 | 45.000                  | 255.9853                       |
| N6    | 223.678                | 200.398                         | 227.000                 | 263.392                 | 46.882                  | 266.8817                       |
| N7    | 218.134                | 209.162                         | 160.517                 | 292.328                 | 41.667                  | 261.6667                       |
| N8    | 266.794                | 201.991                         | 175.000                 | 259.662                 | 46.000                  | 256.0896                       |
| D1    | 446.085                | 522.145                         | 764.570                 | 190.703                 | 19.233                  | 209.2328                       |
| D2    | 455.174                | 518.150                         | 796.670                 | 182.875                 | 21.000                  | 221.8755                       |
| D3    | 568.102                | 560.726                         | 822.849                 | 158.886                 | 23.966                  | 213.9662                       |
| D4    | 520.765                | 590.748                         | 883.348                 | 166.225                 | 23.833                  | 203.8333                       |
| D5    | 354.204                | 539.759                         | 717.824                 | 162.930                 | 23.768                  | 196.7676                       |
| D6    | 381.288                | 512.862                         | 728.130                 | 129.780                 | 17.667                  | 191.6667                       |
| D7    | 569.422                | 598.793                         | 789.121                 | 175.995                 | 16.254                  | 206.254                        |
| D8    | 425.260                | 564.310                         | 800.651                 | 170.880                 | 27.843                  | 197.8432                       |
| MP1   | 178.543                | 205.934                         | 272.701                 | 290.037                 | 52.875                  | 262.8746                       |
| MP2   | 136.271                | 180.103                         | 278.445                 | 278.612                 | 49.037                  | 259.0366                       |
| MP3   | 143.181                | 179.671                         | 263.507                 | 298.295                 | 42.167                  | 263.1667                       |
| MP4   | 114.834                | 180.517                         | 292.227                 | 211.945                 | 43.833                  | 253.8333                       |
| MP5   | 138.492                | 202.840                         | 234.241                 | 289.644                 | 42.590                  | 262.5896                       |
| MP6   | 130.165                | 183.614                         | 234.931                 | 210.269                 | 46.816                  | 260.8165                       |
| MP7   | 119.793                | 204.201                         | 301.207                 | 242.452                 | 52.667                  | 262.6667                       |
| MP8   | 205.833                | 200.070                         | 300.655                 | 208.144                 | 46.333                  | 266.3333                       |
| MPD1  | 156.292                | 305.349                         | 205.429                 | 286.456                 | 44.544                  | 234.5445                       |
| MPD2  | 183.939                | 313.689                         | 206.771                 | 215.629                 | 45.993                  | 245.993                        |
| MPD3  | 147.881                | 326.743                         | 203.796                 | 232.260                 | 44.667                  | 244.6667                       |
| MPD4  | 176.713                | 368.446                         | 207.146                 | 224.810                 | 37.500                  | 237.5                          |
| MPD5  | 149.475                | 387.690                         | 203.639                 | 209.712                 | 41.667                  | 251.6667                       |
| MPD6  | 170.439                | 334.586                         | 201.955                 | 201.667                 | 38.333                  | 238.3333                       |
| MPD7  | 187.448                | 438.448                         | 208.798                 | 201.666                 | 40.287                  | 250.2875                       |
| MPD8  | 158.103                | 379.931                         | 209.171                 | 214.544                 | 39.004                  | 239.0037                       |
| DMP1  | 284.814                | 408.678                         | 349.224                 | 216.667                 | 34.667                  | 244.6667                       |
| DMP2  | 291.742                | 395.360                         | 358.276                 | 207.676                 | 34.667                  | 234.6667                       |
| DMP3  | 274.159                | 363.391                         | 356.181                 | 196.667                 | 33.259                  | 233.259                        |
| DMP4  | 267.354                | 376.802                         | 350.107                 | 183.425                 | 37.882                  | 237.8817                       |
| DMP5  | 306.937                | 430.303                         | 347.843                 | 206.667                 | 37.167                  | 247.1667                       |
| DMP6  | 294.327                | 435.665                         | 357.209                 | 207.676                 | 41.833                  | 241.8333                       |

|      |         |         |         |         |        |          |
|------|---------|---------|---------|---------|--------|----------|
| DMP7 | 350.617 | 351.517 | 347.233 | 205.993 | 41.454 | 237.4545 |
| DMP8 | 251.323 | 378.323 | 358.838 | 197.832 | 40.599 | 240.5993 |



**Table S12** Quantitative analysis of Short-chain fatty acid (n=8)

| Group | Sample volume | Isobutyric acid (µg/g) | Propionic acid(µg/g) | Acetic acid (µg/g) | Butyric acid (µg/g) | Isovaleric acid (µg/g) | Valeric acid (µg/g) | Caproic acid (µg/g) |
|-------|---------------|------------------------|----------------------|--------------------|---------------------|------------------------|---------------------|---------------------|
| N1    | 48.9mg        | 26.6334                | 620.9463             | 1982.0904          | 717.3936            | 25.2502                | 69.5377             | 1.6448              |
| N2    | 50.5mg        | 26.5303                | 559.0251             | 1912.8187          | 965.2975            | 17.6600                | 54.0789             | 1.2753              |
| N3    | 49.1mg        | 27.4537                | 569.0585             | 1803.6358          | 655.6755            | 19.8361                | 57.8265             | 1.4993              |
| N4    | 48.9mg        | 32.6442                | 847.7422             | 2280.6832          | 1093.7807           | 18.7800                | 63.3593             | 1.9923              |
| N5    | 49mg          | 37.5975                | 616.8835             | 1992.9668          | 844.0154            | 22.2219                | 60.7977             | 1.4431              |
| N6    | 50.6mg        | 15.7612                | 648.1041             | 2527.9472          | 1296.9300           | 8.3364                 | 69.7431             | 1.4060              |
| N7    | 19.8326       | 583.2576               | 2198.5391            | 1017.7547          | 13.7931             | 55.7465                | 1.3713              | 19.8326             |
| N8    | 35.7076       | 703.9956               | 1968.1749            | 839.947            | 23.5683             | 69.3673                | 1.7158              | 35.7076             |
| D1    | 49.7mg        | 32.8674                | 535.3357             | 1484.2232          | 366.3216            | 18.7711                | 29.8479             | 0.7989              |
| D2    | 49.9mg        | 26.2089                | 495.4817             | 1691.1621          | 299.9136            | 21.0980                | 5.2879              | 0.6939              |
| D3    | 49.2mg        | 34.1680                | 624.2534             | 1794.0812          | 687.4768            | 26.0289                | 16.6934             | 0.7925              |
| D4    | 51mg          | 30.2236                | 651.8890             | 2201.7533          | 559.2649            | 24.4708                | 35.8148             | 0.9157              |
| D5    | 49.7mg        | 30.5209                | 774.0238             | 2282.1363          | 748.7211            | 23.6742                | 42.6795             | 0.9259              |
| D6    | 49.4mg        | 32.0408                | 635.3607             | 2468.7272          | 750.6208            | 23.1691                | 51.3986             | 1.1037              |
| D7    | 29.5867       | 679.8573               | 1906.5213            | 619.9683           | 20.8341             | 21.7836                | 0.8571              | 29.5867             |
| D8    | 32.4231       | 558.924                | 2067.5163            | 517.4709           | 24.9132             | 38.7901                | 0.8852              | 32.4231             |
| MP1   | 51.5mg        | 25.4098                | 450.3317             | 1552.5565          | 660.6501            | 18.3171                | 46.9584             | 1.4134              |
| MP2   | 50.8mg        | 40.4907                | 637.2194             | 2074.3113          | 939.7332            | 22.1619                | 54.2969             | 1.4242              |
| MP3   | 50.6mg        | 45.9246                | 473.9338             | 1407.9251          | 491.8563            | 29.7515                | 50.9166             | 1.2226              |
| MP4   | 49.2mg        | 18.2328                | 614.2282             | 1786.9273          | 481.3931            | 13.1195                | 39.8712             | 0.9252              |
| MP5   | 51.2mg        | 47.5492                | 636.4127             | 2732.2295          | 793.7704            | 33.8226                | 66.6506             | 1.1673              |
| MP6   | 49.4mg        | 29.1841                | 608.3203             | 1822.5205          | 529.3429            | 22.5999                | 44.9241             | 1.6485              |

|      |         |          |           |           |          |         |         |         |
|------|---------|----------|-----------|-----------|----------|---------|---------|---------|
| MP7  | 38.1769 | 593.8771 | 1995.7834 | 584.2911  | 25.1985  | 51.9775 | 1.1811  | 38.1769 |
| MP8  | 30.7535 | 546.2711 | 1796.3759 | 714.6248  | 21.3926  | 49.2279 | 1.4194  | 30.7535 |
| MPD1 | 50mg    | 23.5898  | 438.1210  | 1553.5077 | 358.9302 | 18.8529 | 27.4466 | 1.0120  |
| MPD2 | 49.7mg  | 23.5502  | 542.8225  | 1457.0482 | 363.0033 | 12.3369 | 12.7836 | 0.6485  |
| MPD3 | 26.9mg  | 31.4370  | 422.3513  | 1894.5737 | 526.5509 | 21.9951 | 36.3779 | 1.5406  |
| MPD4 | 49.9mg  | 25.6169  | 491.7564  | 1640.4083 | 555.9081 | 16.4813 | 31.6210 | 0.9464  |
| MPD5 | 51.6mg  | 30.5632  | 569.5995  | 2182.6851 | 538.2816 | 16.2014 | 49.3786 | 1.1216  |
| MPD6 | 49.5mg  | 31.1839  | 403.3388  | 1995.4296 | 428.0203 | 23.2850 | 37.6171 | 1.0305  |
| MPD7 | 29.8812 | 451.9817 | 2011.9313 | 492.6635  | 17.1323  | 34.7713 | 0.8775  | 29.8812 |
| MPD8 | 25.4319 | 504.0143 | 1562.6169 | 430.9107  | 19.2518  | 30.3035 | 1.2225  | 25.4319 |
| DMP1 | 50.4mg  | 41.8559  | 818.3570  | 1989.8679 | 471.7439 | 25.1756 | 54.4761 | 1.3071  |
| DMP2 | 49.3mg  | 16.6283  | 670.0470  | 1797.0663 | 360.6276 | 14.2100 | 36.4306 | 0.7903  |
| DMP3 | 51.1mg  | 22.1969  | 603.0992  | 2042.0559 | 492.5700 | 19.0941 | 41.4307 | 1.1046  |
| DMP4 | 50.4mg  | 26.7154  | 717.5884  | 2082.5754 | 446.2313 | 20.1100 | 34.4263 | 1.1942  |
| DMP5 | 49.2mg  | 40.3552  | 710.8701  | 1730.0449 | 496.1687 | 28.3738 | 47.4209 | 0.8710  |
| DMP6 | 51.2mg  | 19.6447  | 611.7983  | 2116.3999 | 670.6687 | 12.8029 | 40.1439 | 1.3577  |
| DMP7 | 21.8876 | 726.5546 | 1901.9342 | 513.8727  | 17.3397  | 44.9419 | 1.0511  | 21.8876 |
| DMP8 | 33.9117 | 650.6981 | 2017.4057 | 465.4672  | 22.5823  | 39.8364 | 1.1563  | 33.9117 |

**Table S13** Chao index

|   | Chao1   |         |         |         |         |
|---|---------|---------|---------|---------|---------|
|   | N       | D       | MP      | MPD     | DMP     |
| 1 | 969.11  | 731.923 | 535.881 | 607.443 | 754.315 |
| 2 | 560.865 | 488.314 | 821.676 | 421.078 | 641.581 |
| 3 | 643.501 | 688.68  | 824.842 | 587.628 | 837.066 |
| 4 | 710.571 | 443.508 | 667.286 | 559.752 | 628.428 |
| 5 | 858.504 | 346.38  | 748.014 | 454.952 | 703.883 |
| 6 | 868.743 | 741.913 | 618.074 | 680.846 | 1049.22 |
| 7 | 798.173 | 498.532 | 689.663 | 498.467 | 711.845 |
| 8 | 738.926 | 648.375 | 715.589 | 605.809 | 826.390 |

**Table S14** Phylogenetic diversity (PD) whole tree analysis

|   | PD      |         |         |         |         |
|---|---------|---------|---------|---------|---------|
|   | N       | D       | MP      | MPD     | DMP     |
| 1 | 53.5719 | 33.0222 | 39.1488 | 35.5764 | 46.0047 |
| 2 | 33.3596 | 36.7102 | 44.9845 | 34.8607 | 42.4718 |
| 3 | 36.8179 | 32.9017 | 43.8329 | 39.0036 | 46.2499 |
| 4 | 40.1067 | 31.2071 | 40.8852 | 34.7189 | 40.038  |
| 5 | 41.7338 | 28.996  | 43.5444 | 33.1117 | 40.2079 |
| 6 | 46.2133 | 39.5243 | 40.22   | 41.0286 | 48.7896 |
| 7 | 39.0176 | 30.7781 | 43.0108 | 35.1787 | 46.0017 |
| 8 | 44.9161 | 36.6759 | 41.1939 | 37.5881 | 41.9186 |

**Table S15** Venn diagram of OTUs

| Venn-OUT |      |
|----------|------|
| N        | 1328 |
| D        | 814  |
| MP       | 999  |
| MPD      | 955  |
| DMP      | 1180 |

**Table S16** Relative abundance at Phylum level (%)

| Group | Firmicutes | Bacteroidetes | Actinobacteria | Proteobacteria | Verrucomicrobi<br>a | Tenericute<br>s | TM7   | Deferribacteres | Cyanobacteria | other   |
|-------|------------|---------------|----------------|----------------|---------------------|-----------------|-------|-----------------|---------------|---------|
| N     | 33.226     | 61.977        | 2.134          | 1.894          | 0.00494             | 0.22            | 0.292 | 0.162           | 0.01446       | 0.03597 |
| D     | 63.194     | 26.619        | 2.476          | 4.808          | 2.087               | 0.32            | 0.412 | 0.03104         | 0.02857       | 0.02504 |
| MP    | 33.067     | 55.247        | 4.499          | 1.838          | 3.635               | 1.077           | 0.443 | 0.01234         | 0.06631       | 0.02575 |
| MPD   | 46.967     | 47.075        | 3.762          | 1.66           | 0.00423             | 0.369           | 0.123 | 0.09452         | 0.05749       | 0.02363 |
| DMP   | 47.408     | 48.498        | 1.258          | 1.432          | 0.08112             | 0.433           | 0.13  | 0.417           | 0.00282       | 0.03068 |

**Table S17** Relative abundance of main bacteria at Phylum level (%)

| Taxon           | Abundance (yEr±, n=8) |      |          |      |          |      |          |      |          |      |
|-----------------|-----------------------|------|----------|------|----------|------|----------|------|----------|------|
|                 | N                     |      | D        |      | MP       |      | MPD      |      | DMP      |      |
| Firmicutes      | 33.22614              | 2.36 | 63.19402 | 1.87 | 33.0675  | 1.09 | 46.9673  | 3.9  | 47.40815 | 4.76 |
| Bacteroidetes   | 61.97674              | 2.43 | 26.61927 | 2.09 | 55.24745 | 3.09 | 47.07528 | 2.98 | 48.4981  | 1.87 |
| Actinobacteria  | 2.13412               | 0.12 | 2.47552  | 0.21 | 4.49925  | 0.32 | 3.76213  | 0.14 | 1.25804  | 0.12 |
| Proteobacteria  | 1.89359               | 0.18 | 4.80786  | 0.28 | 1.83786  | 0.15 | 1.65975  | 0.12 | 1.43227  | 0.18 |
| Verrucomicrobia | 1.00494               | 0.12 | 2.08686  | 0.13 | 3.63481  | 0.15 | 1.00423  | 0.57 | 1.08112  | 0.21 |

**Table S18** Relative abundance at Family level (%)

| Taxon                      | N        | D        | MP       | MPD      | DMP      |
|----------------------------|----------|----------|----------|----------|----------|
| Muribaculaceae             | 51.53406 | 10.57349 | 38.36479 | 29.1716  | 29.35514 |
| Lachnospiraceae            | 14.19622 | 36.4738  | 12.1064  | 26.99622 | 28.98891 |
| Ruminococcaceae            | 10.76865 | 22.77594 | 20.77302 | 7.38509  | 11.25748 |
| Lactobacillaceae           | 4.86323  | 6.28527  | 16.33373 | 13.04476 | 12.39701 |
| Erysipelotrichaceae        | 3.36642  | 3.3911   | 3.48457  | 5.23073  | 6.85592  |
| Coriobacteriaceae          | 2.46459  | 2.83773  | 1.76344  | 1.40335  | 1.0958   |
| Paraprevotellaceae         | 1.3582   | 0.71032  | 1.36244  | 1.84139  | 1.72276  |
| Desulfovibrionaceae        | 3.58896  | 0.9378   | 0.33457  | 1.22242  | 0.75793  |
| Bacteroidaceae             | 0.24582  | 3.23605  | 0.32165  | 1.90946  | 2.98022  |
| Turicibacteraceae          | 0        | 0.59216  | 0.21831  | 4.76024  | 0.24794  |
| Verrucomicrobiaceae        | 2.08686  | 3.63481  | 0.00494  | 0.00423  | 0.08112  |
| Bifidobacteriaceae         | 0.0067   | 0.65693  | 1.35586  | 2.35067  | 1.15589  |
| Rikenellaceae              | 0.76392  | 0.52092  | 0.70185  | 0.88737  | 1.02597  |
| Clostridiaceae             | 0.17105  | 0.16823  | 0.19151  | 1.21254  | 0.35939  |
| Mogibacteriaceae           | 0.34176  | 0.55549  | 0.36715  | 0.26981  | 0.56818  |
| Odoribacteraceae           | 0.82282  | 1.04466  | 0.08147  | 0.07477  | 0.03739  |
| unidentified_Bacteroidales | 0.65283  | 0.94238  | 0.03033  | 0.22854  | 0.00917  |
| Dehalobacteriaceae         | 0.40312  | 0.34422  | 0.31954  | 0.26134  | 0.48142  |
| Helicobacteraceae          | 0.39783  | 0.56148  | 0.22995  | 0.13579  | 0.39854  |
| F16                        | 0.41194  | 0.44333  | 0.29203  | 0.12309  | 0.13049  |
| other                      | 1.55501  | 3.31386  | 1.36244  | 1.48658  | 0.09332  |

**Table S19** Relative abundance of main bacteria at Family level (%)

| Taxon               | Abundance (yEr±, n=8) |       |          |      |          |        |          |         |          |      |
|---------------------|-----------------------|-------|----------|------|----------|--------|----------|---------|----------|------|
|                     | N                     |       | D        |      | MP       |        | MPD      |         | DMP      |      |
| Muribaculaceae      | 51.53406              | 2.09  | 10.57349 | 0.57 | 38.36479 | 1.38   | 29.1716  | 1.76    | 29.35514 | 2.34 |
| Lachnospiraceae     | 14.19622              | 1.56  | 36.4738  | 2.34 | 12.1064  | 1.21   | 26.99622 | 2.09    | 28.98891 | 1.17 |
| Ruminococcaceae     | 10.76865              | 0.56  | 22.77594 | 1.04 | 20.77302 | 0.62   | 6.38509  | 0.43    | 11.25748 | 0.68 |
| Lactobacillaceae    | 4.86323               | 0.15  | 6.28527  | 0.28 | 16.33373 | 1.23   | 13.04476 | 0.58    | 12.39701 | 2.09 |
| Erysipelotrichaceae | 3.36642               | 0.34  | 3.3911   | 0.57 | 3.48457  | 0.21   | 5.23073  | 0.54    | 6.85592  | 0.19 |
| Coriobacteriaceae   | 2.46459               | 0.11  | 2.83773  | 0.23 | 1.76344  | 0.23   | 1.40335  | 0.15    | 1.0958   | 0.18 |
| Paraprevotellaceae  | 1.3582                | 0.12  | 0.71032  | 0.13 | 1.36244  | 0.21   | 1.84139  | 0.24    | 1.72276  | 0.32 |
| Desulfovibrionaceae | 3.58896               | 0.27  | 0.9378   | 0.11 | 0.33457  | 0.26   | 1.22242  | 0.15    | 0.75793  | 0.08 |
| Bacteroidaceae      | 0.24582               | 0.002 | 3.23605  | 0.21 | 0.32165  | 0.07   | 1.90946  | 0.25    | 2.98022  | 0.38 |
| Turicibacteraceae   | 0                     | 0     | 0.59216  | 0.08 | 0.21831  | 0.02   | 4.76024  | 0.51    | 0.24794  | 0.05 |
| Verrucomicrobiaceae | 2.08686               | 0.29  | 3.63481  | 0.23 | 0.00494  | 0.0009 | 0.00423  | 0.00012 | 0.08112  | 0.01 |
| Bifidobacteriaceae  | 0.0067                | 0     | 0.65693  | 0.05 | 1.35586  | 0.12   | 2.35067  | 0.21    | 1.15589  | 0.13 |

**Table S20** Relative abundance at Genus level (%)

| Taxon                         | N        | D        | MP       | MPD      | DMP      |
|-------------------------------|----------|----------|----------|----------|----------|
| Norank_f_Muribaculaceae       | 50.42499 | 20.95384 | 37.50545 | 35.42584 | 34.40022 |
| Lachnospiraceae_NK4A136_group | 12.33202 | 30.74304 | 15.82147 | 16.3108  | 10.23221 |
| Bacteroides                   | 12.4083  | 20.25559 | 9.08146  | 7.96315  | 15.04895 |
| Lactobacillus                 | 4.86146  | 3.28386  | 16.32985 | 10.04194 | 12.39067 |
| Oscillospira                  | 2.21489  | 1.75533  | 4.74475  | 4.34067  | 4.9219   |
| Adlercreutzia                 | 2.04101  | 1.97576  | 1.51445  | 1.22595  | 0.95402  |
| unidentified_Lachnospiraceae  | 0.24582  | 2.23605  | 0.32165  | 1.90946  | 2.98022  |
| Desulfovibrio                 | 0.9379   | 4.59499  | 1.20796  | 1.18292  | 0.33682  |
| [Ruminococcus]                | 0.76921  | 0.58287  | 0.54949  | 1.34128  | 1.65517  |
| Turicibacter                  | 0        | 0.59216  | 0.21831  | 4.76024  | 0.24794  |
| Akkermansia                   | 2.08686  | 0.63481  | 2.00494  | 3.00423  | 3.08112  |
| Ruminococcus                  | 0.59252  | 0.95191  | 0.8461   | 1.15294  | 1.82658  |
| [Prevotella]                  | 0.76675  | 3.08747  | 0.26157  | 0.62872  | 0.3963   |
| Bifidobacterium               | 0.0067   | 0.65693  | 1.35586  | 2.35067  | 2.15589  |
| Coprococcus                   | 1.17481  | 0.21655  | 0.49059  | 1.39524  | 0.6687   |
| Paraprevotella                | 0.59146  | 0.62285  | 0.10087  | 0.21267  | 1.32646  |
| Clostridium                   | 0.09558  | 0.98718  | 0.27545  | 0.68069  | 0.27404  |
| Odoribacter                   | 0.82282  | 1.04466  | 0.08147  | 0.07477  | 0.03739  |
| Dehalobacterium               | 0.40312  | 0.34422  | 0.31954  | 0.26134  | 0.48142  |
| Roseburia                     | 0.04409  | 0        | 1.6915   | 0        | 0        |
| Helicobacter                  | 0.39783  | 0.56148  | 0.22995  | 0.13579  | 0.39854  |
| Sutterella                    | 0.70785  | 1.1908   | 0.13684  | 0.06489  | 0.22784  |
| other                         | 6.07401  | 2.72764  | 4.91049  | 5.5358   | 5.95762  |

**Table S21** Relative abundance of main bacteria at Genus level (%)

| Taxon                         | Abundance (yEr±, n=8) |      |          |      |          |        |          |        |          |        |
|-------------------------------|-----------------------|------|----------|------|----------|--------|----------|--------|----------|--------|
|                               | N                     |      | D        |      | MP       |        | MPD      |        | DMP      |        |
| Norank_f_Muribaculaceae       | 50.42499              | 3.75 | 20.95384 | 2.18 | 37.50545 | 3.98   | 35.42584 | 2.09   | 34.40022 | 1.55   |
| Lachnospiraceae_NK4A136_group | 12.33202              | 1.55 | 30.74304 | 2.88 | 15.82147 | 1.21   | 16.3108  | 1.85   | 10.23221 | 0.59   |
| Bacteroides                   | 12.4083               | 0.99 | 20.25559 | 2.32 | 9.08146  | 1.09   | 7.96315  | 0.58   | 15.04895 | 1.22   |
| Lactobacillus                 | 4.86146               | 0.28 | 3.28386  | 0.33 | 16.32985 | 1.34   | 10.04194 | 1.34   | 12.39067 | 2.09   |
| Oscillospira                  | 2.21489               | 0.15 | 1.75533  | 0.12 | 4.74475  | 0.56   | 4.34067  | 0.38   | 4.9219   | 0.54   |
| Adlercreutzia                 | 2.04101               | 0.22 | 1.97576  | 0.34 | 1.51445  | 0.18   | 1.22595  | 0.18   | 0.95402  | 0.09   |
| unidentified_Lachnospiraceae  | 0.24582               | 0.05 | 2.23605  | 0.22 | 0.32165  | 0.04   | 1.90946  | 0.18   | 2.98022  | 0.32   |
| Desulfovibrio                 | 0.9379                | 0.05 | 4.59499  | 0.58 | 1.20796  | 0.21   | 1.18292  | 0.28   | 0.33682  | 0.08   |
| [Ruminococcus]                | 0.76921               | 0.08 | 0.58287  | 0.04 | 0.54949  | 0.09   | 1.34128  | 0.18   | 1.65517  | 0.23   |
| Turicibacter                  | 0                     | 0    | 0.59216  | 0.07 | 0.21831  | 0.01   | 4.76024  | 0.48   | 0.24794  | 0.07   |
| Akkermansia                   | 2.08686               | 0.32 | 0.63481  | 0.05 | 2.00494  | 0.34   | 3.00423  | 0.18   | 3.08112  | 0.28   |
| Ruminococcus                  | 0.59252               | 0.02 | 0.95191  | 0.05 | 0.8461   | 0.04   | 1.15294  | 0.12   | 1.82658  | 0.28   |
| [Prevotella]                  | 0.76675               | 0.06 | 3.08747  | 0.08 | 0.26157  | 0.06   | 0.62872  | 0.02   | 0.3963   | 0.09   |
| Bifidobacterium               | 0.0067                | 0    | 0.65693  | 0.06 | 1.35586  | 0.15   | 2.35067  | 0.13   | 2.15589  | 0.22   |
| Coprococcus                   | 1.17481               | 0.11 | 0.21655  | 0.01 | 0.49059  | 0.09   | 1.39524  | 0.09   | 0.6687   | 0.07   |
| Paraprevotella                | 0.59146               | 0.09 | 0.62285  | 0.02 | 0.10087  | 0.01   | 0.21267  | 0.03   | 1.32646  | 0.21   |
| Clostridium                   | 0.09558               | 0    | 0.98718  | 0.08 | 0.27545  | 0.02   | 0.68069  | 0.08   | 0.27404  | 0.07   |
| Odoribacter                   | 0.82282               | 0.02 | 1.04466  | 0.04 | 0.08147  | 0.0021 | 0.07477  | 0.0023 | 0.03739  | 0.0012 |
| Dehalobacterium               | 0.40312               | 0.03 | 0.34422  | 0.04 | 0.31954  | 0.019  | 0.26134  | 0.06   | 0.48142  | 0.04   |
| Roseburia                     | 0.04409               | 0    | 0        | 0    | 1.6915   | 0.23   | 0        | 0      | 0        | 0      |
| Helicobacter                  | 0.39783               | 0.09 | 0.56148  | 0.06 | 0.22995  | 0.02   | 0.13579  | 0.01   | 0.39854  | 0.04   |
| Sutterella                    | 0.70785               | 0.07 | 1.1908   | 0.11 | 0.13684  | 0.02   | 0.06489  | 0      | 0.22784  | 0.04   |



**Table S22** The relative expression of related factors by image j software

| Factors               | IntDen |        |        |        |
|-----------------------|--------|--------|--------|--------|
|                       | N      | D      | MPD    | DMP    |
| Foxp3/ $\beta$ -actin | 306697 | 122764 | 170371 | 191662 |
| ROR $\gamma$ t        | 141472 | 361345 | 257560 | 227644 |
| JAK2                  | 119506 | 289395 | 208853 | 166887 |
| STAT3                 | 171966 | 358949 | 246717 | 195183 |
| p-STAT3               | 117193 | 388877 | 196600 | 137106 |
| GPR41                 | 268055 | 170336 | 349705 | 202707 |
| GPR43                 | 65358  | 61208  | 165825 | 190347 |
| HDAC1                 | 88793  | 106361 | 162583 | 176949 |
| $\beta$ -actin        | 306174 | 306635 | 305260 | 278700 |

**Table S23** Correlation analysis of the 22 most dominant genera with colitis index, inflammatory factors, IgA and SCFA by R Studio software

| ID                            | N        | D        | MP       | MPD      | DMP      |
|-------------------------------|----------|----------|----------|----------|----------|
| Norank_f_Muribaculaceae       | 50.42499 | 20.95384 | 37.50545 | 35.42584 | 34.40022 |
| Lachnospiraceae_NK4A136_group | 12.33202 | 30.74304 | 15.82147 | 16.3108  | 10.23221 |
| Bacteroides                   | 12.4083  | 20.25559 | 9.08146  | 7.96315  | 15.04895 |
| Lactobacillus                 | 4.86146  | 3.28386  | 16.32985 | 10.04194 | 12.39067 |
| Oscillospira                  | 2.21489  | 1.75533  | 4.74475  | 4.34067  | 4.9219   |
| Adlercreutzia                 | 2.04101  | 1.97576  | 1.51445  | 1.22595  | 0.95402  |
| unidentified_Lachnospiraceae  | 0.24582  | 2.23605  | 0.32165  | 1.90946  | 2.98022  |
| Desulfovibrio                 | 0.9379   | 4.59499  | 1.20796  | 1.18292  | 0.33682  |
| [Ruminococcus]                | 0.76921  | 0.58287  | 0.54949  | 1.34128  | 1.65517  |
| Turicibacter                  | 0        | 0.59216  | 0.21831  | 4.76024  | 0.24794  |
| Akkermansia                   | 2.08686  | 0.63481  | 2.00494  | 3.00423  | 3.08112  |
| Ruminococcus                  | 0.59252  | 0.95191  | 0.8461   | 1.15294  | 1.82658  |
| [Prevotella]                  | 0.76675  | 3.08747  | 0.26157  | 0.62872  | 0.3963   |
| Bifidobacterium               | 0.0067   | 0.65693  | 1.35586  | 2.35067  | 2.15589  |
| Coprococcus                   | 1.17481  | 0.21655  | 0.49059  | 1.39524  | 0.6687   |
| Paraprevotella                | 0.59146  | 0.62285  | 0.10087  | 0.21267  | 1.32646  |
| Clostridium                   | 0.09558  | 0.98718  | 0.27545  | 0.68069  | 0.27404  |
| Odoribacter                   | 0.82282  | 1.04466  | 0.08147  | 0.07477  | 0.03739  |
| Dehalobacterium               | 0.40312  | 0.34422  | 0.31954  | 0.26134  | 0.48142  |
| Roseburia                     | 0.04409  | 0        | 1.6915   | 0        | 0        |
| Helicobacter                  | 0.39783  | 0.56148  | 0.22995  | 0.13579  | 0.39854  |
| Sutterella                    | 0.70785  | 1.1908   | 0.13684  | 0.06489  | 0.22784  |
| ID                            | N        | D        | MP       | MPD      | DMP      |

|                    |          |          |          |          |          |
|--------------------|----------|----------|----------|----------|----------|
| DAI scores         | 0        | 9.5      | 0        | 3.7      | 5.7      |
| Colon Length       | 8.09     | 7.06     | 7.93     | 7.5      | 7.28     |
| Histological score | 0        | 11.66667 | 0        | 2.333333 | 2.666667 |
| Globet cells       | 887.5    | 595      | 1262.5   | 685      | 767.5    |
| IL-6               | 219.312  | 465.696  | 145.992  | 166.704  | 290.236  |
| TNF- $\alpha$      | 183.264  | 550.536  | 192.124  | 356.704  | 392.924  |
| IL-17              | 231.696  | 787.356  | 272.064  | 205.736  | 353.176  |
| IL-10              | 270.444  | 167.82   | 253.188  | 223.5    | 202.86   |
| IgA                | 45.06    | 21.66    | 47.016   | 41.58    | 37.536   |
| Total SCFAs        | 3118.788 | 2309.58  | 4639.991 | 3601.312 | 3362.874 |
| Acetic acid        | 1803.636 | 1484.223 | 2732.23  | 2182.685 | 2116.4   |
| Propionic acid     | 559.0251 | 405.4817 | 818.357  | 637.2194 | 569.5995 |
| Butyric acid       | 655.6755 | 299.9136 | 939.7332 | 670.6687 | 555.9081 |
| Valeric acid       | 54.0789  | 16.2879  | 66.6506  | 54.4761  | 49.3786  |
| Caproic acid       | 1.2753   | 0.6939   | 1.6485   | 1.5406   | 1.3577   |
| Isovaleric acid    | 18.3364  | 8.7711   | 33.8226  | 23.285   | 28.3738  |
| Isobutyric acid    | 26.7612  | 15.2089  | 47.5492  | 31.437   | 41.8559  |

**Table S24** The quality check data for 16S rDNA sequencing

| Serial Number | sample number | Sample Name | Pre primer number | Qualified or Not | Actual fragment size (bp) | Recovery concentration (ng/ul) | Amplification remarks |
|---------------|---------------|-------------|-------------------|------------------|---------------------------|--------------------------------|-----------------------|
| 1             | ZTPSN22GG215  | N1          | P061              | Qualified        | 500bp                     | 6.10                           | /                     |
| 2             | ZTPSN22GG216  | N2          | P062              | Qualified        | 500bp                     | 3.58                           | /                     |
| 3             | ZTPSN22GG217  | N3          | P063              | Qualified        | 500bp                     | 4.41                           | /                     |
| 4             | ZTPSN22GG218  | N4          | P064              | Qualified        | 500bp                     | 4.07                           | /                     |
| 5             | ZTPSN22GG219  | N5          | P065              | Qualified        | 500bp                     | 4.22                           | /                     |
| 6             | ZTPSN22GG220  | N6          | P066              | Qualified        | 500bp                     | 5.55                           | /                     |
| 7             | ZTPSN22GG221  | N7          | P067              | Qualified        | 500bp                     | 4.76                           | /                     |
| 8             | ZTPSN22GG222  | N8          | P068              | Qualified        | 500bp                     | 5.01                           | /                     |
| 9             | ZTPSN22GG223  | D1          | P069              | Qualified        | 500bp                     | 4.68                           | /                     |
| 10            | ZTPSN22GG224  | D2          | P070              | Qualified        | 500bp                     | 3.01                           | /                     |
| 11            | ZTPSN22GG225  | D3          | P071              | Qualified        | 500bp                     | 4.70                           | /                     |
| 12            | ZTPSN22GG226  | D4          | P072              | Qualified        | 500bp                     | 4.63                           | /                     |
| 13            | ZTPSN22GG227  | D5          | P073              | Qualified        | 500bp                     | 4.64                           | /                     |
| 14            | ZTPSN22GG228  | D6          | P074              | Qualified        | 500bp                     | 5.26                           | /                     |
| 15            | ZTPSN22GG229  | D7          | P075              | Qualified        | 500bp                     | 4.98                           | /                     |
| 16            | ZTPSN22GG230  | D8          | P076              | Qualified        | 500bp                     | 5.29                           | /                     |
| 17            | ZTPSN22GG231  | MP1         | P077              | Qualified        | 500bp                     | 3.56                           | /                     |
| 18            | ZTPSN22GG232  | MP2         | P078              | Qualified        | 500bp                     | 5.43                           | /                     |
| 19            | ZTPSN22GG233  | MP3         | P079              | Qualified        | 500bp                     | 6.16                           | /                     |
| 20            | ZTPSN22GG234  | MP4         | P080              | Qualified        | 500bp                     | 3.60                           | /                     |
| 21            | ZTPSN22GG235  | MP5         | P081              | Qualified        | 500bp                     | 6.23                           | /                     |
| 22            | ZTPSN22GG236  | MP6         | P082              | Qualified        | 500bp                     | 4.50                           | /                     |

|    |              |      |      |           |       |      |   |
|----|--------------|------|------|-----------|-------|------|---|
| 23 | ZTPSN22GG237 | MP7  | P083 | Qualified | 500bp | 3.98 | / |
| 24 | ZTPSN22GG238 | MP8  | P084 | Qualified | 500bp | 4.54 | / |
| 25 | ZTPSN22GG239 | MPD1 | P085 | Qualified | 500bp | 4.87 | / |
| 26 | ZTPSN22GG240 | MPD2 | P086 | Qualified | 500bp | 3.40 | / |
| 27 | ZTPSN22GG241 | MPD3 | P087 | Qualified | 500bp | 4.55 | / |
| 28 | ZTPSN22GG242 | MPD4 | P088 | Qualified | 500bp | 3.32 | / |
| 29 | ZTPSN22GG243 | MPD5 | P089 | Qualified | 500bp | 2.30 | / |
| 30 | ZTPSN22GG244 | MPD6 | P090 | Qualified | 500bp | 5.70 | / |
| 31 | ZTPSN22GG245 | MPD7 | P091 | Qualified | 500bp | 3.98 | / |
| 32 | ZTPSN22GG246 | MPD8 | P092 | Qualified | 500bp | 3.45 | / |
| 33 | ZTPSN22GG247 | DMP1 | P093 | Qualified | 500bp | 9.32 | / |
| 34 | ZTPSN22GG248 | DMP2 | P094 | Qualified | 500bp | 6.40 | / |
| 35 | ZTPSN22GG249 | DMP3 | P095 | Qualified | 500bp | 7.40 | / |
| 36 | ZTPSN22GG250 | DMP4 | P096 | Qualified | 500bp | 5.49 | / |
| 37 | ZTPSN22GG251 | DMP5 | P097 | Qualified | 500bp | 6.64 | / |
| 38 | ZTPSN22GG252 | DMP6 | P098 | Qualified | 500bp | 7.24 | / |
| 39 | ZTPSN22GG253 | DMP7 | P099 | Qualified | 500bp | 4.09 | / |
| 40 | ZTPSN22GG254 | DMP8 | P100 | Qualified | 500bp | 3.97 | / |

Remarks:

1. The amplification regions are all standard bacteria 16S V3V4 (a), and the sequencing platform is Novaseq-PE250.
2. Amplification remarks: A: completely without bands; B: A very dispersed fragment; C: Non specific bands, no target fragments; Fill in "/" without special circumstances.
3. Description of recovery concentration: If the recovery concentration is not less than 0.5ng/ul, it meets the requirements for library construction.
