# Supplementary material for: The maca protein ameliorates DSS-induced colitis in mice by modulating the gut microbiota and production of SCFAs
Source: Royal Society of Chemistry journal article supplement (doi:10.1039/d3fo03654e), 2023-01-01
Supplement: d3fo03654e2.pdf [file d3fo03654e2.pdf]

## Electronic Supplementary Information

(For Main Article)

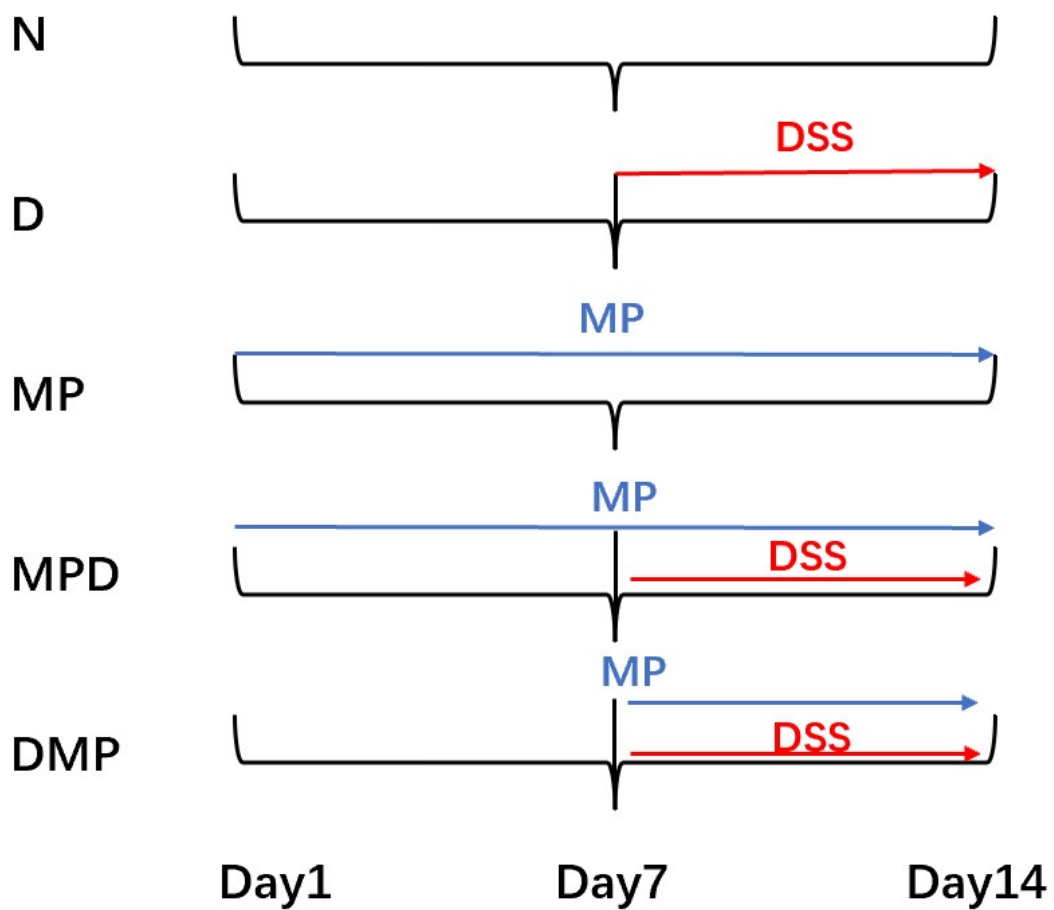

**Figure S1.** Experimental design of the MCP on DSS-induced mouse colitis.

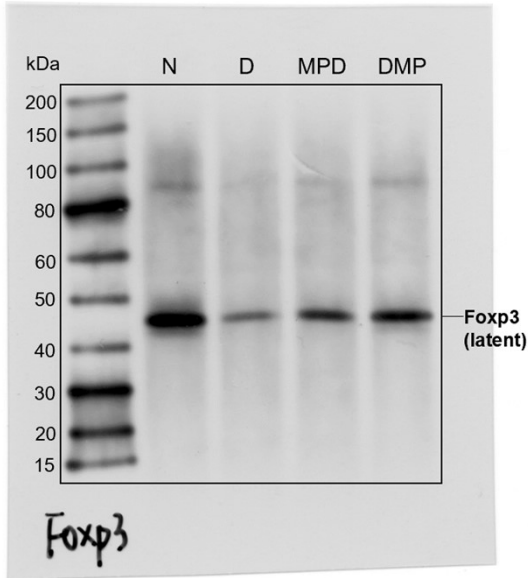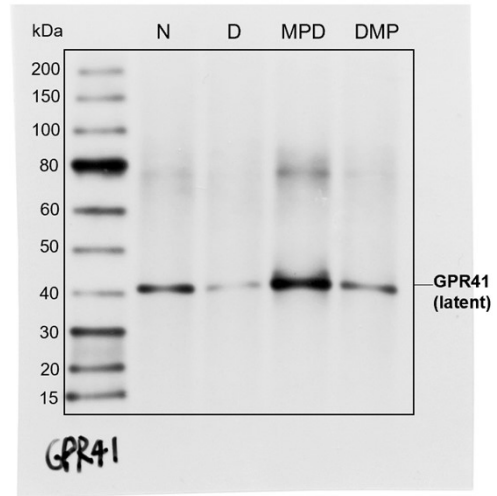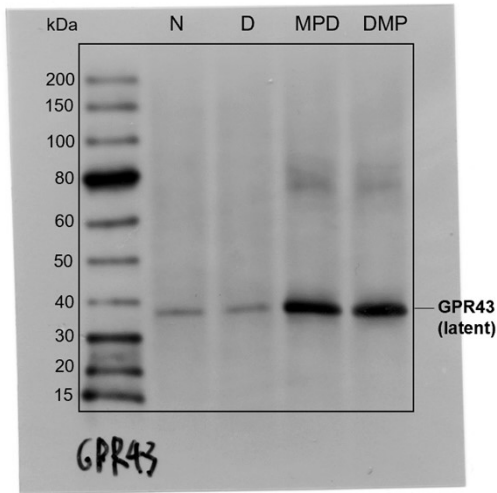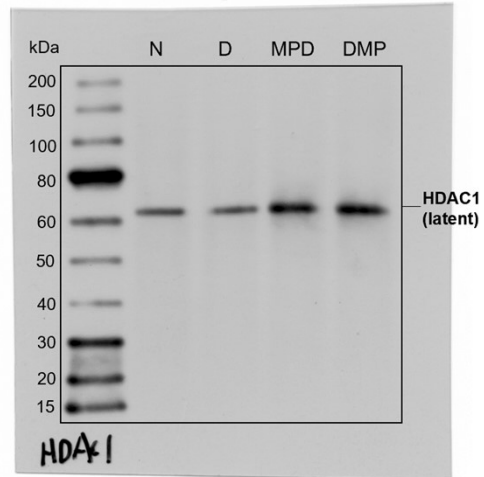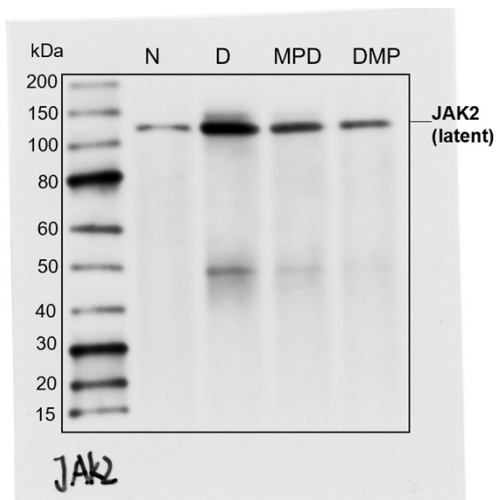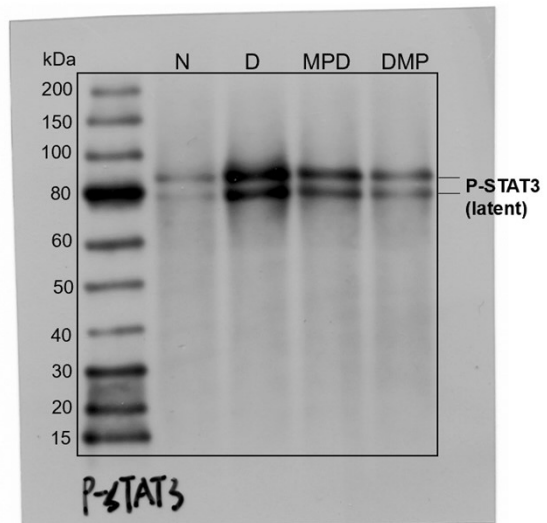

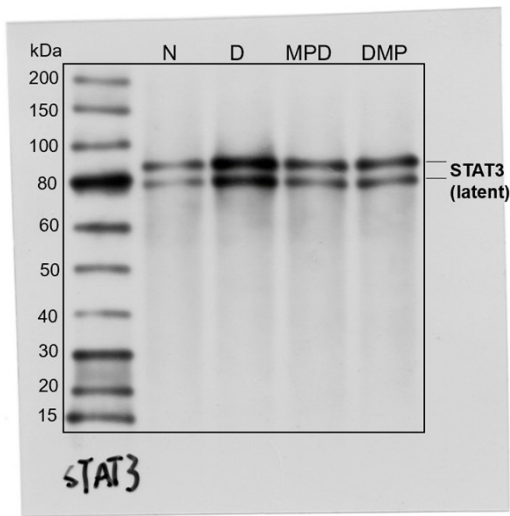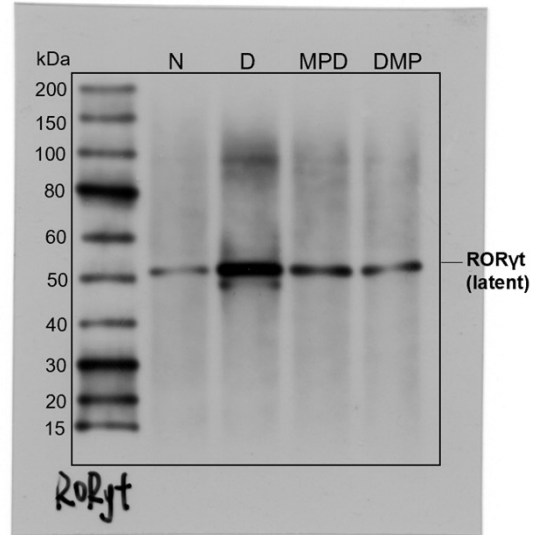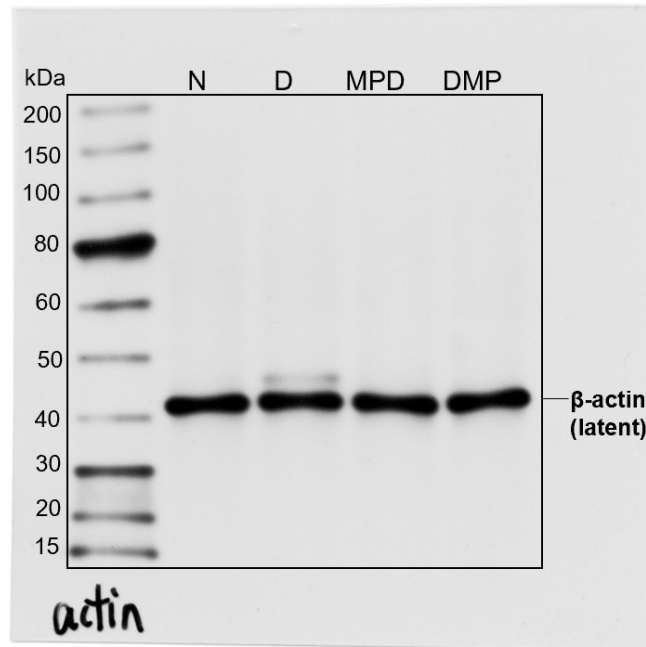

Figure S2 The underlying raw images by Western Blot

**Table S1** Scoring standard of disease activity index

| Scores | Weight loss (%) | Feces status                           | Bloody stools                           |
|--------|-----------------|----------------------------------------|-----------------------------------------|
| 0      | No loss         | Normal                                 | No blood (No color within 2min)         |
| 1      | 0-10            | Loose stool (not attached to the anus) | Presence (Within 1- 2 min, fuchsia)     |
| 2      | 11-15           | Loose stool (attach to the anus)       | Presence (Within 1 min, fuchsia)        |
| 3      | 16-20           | Diarrhea (liquid)                      | Presence (Within 10 sec, purplish blue) |
| 4      | >20             | Severe diarrhea                        | Gross blood (Instantly purplish blue)   |

**Table S2** Histopathology Grading System for Colonic Sections

| Feature graded             | Grade | Description                                                                                                                           |
|----------------------------|-------|---------------------------------------------------------------------------------------------------------------------------------------|
| Inflammation               | 0     | normal                                                                                                                                |
|                            | 1     | minimal infiltration of lamina propria, focal to multifocal                                                                           |
|                            | 2     | mild infiltration of lamina propria, multifocal, mild gland separation                                                                |
|                            | 3     | moderate to mixed infiltration, multifocal with minimal edema                                                                         |
|                            | 4     | marked mixed infiltration into submucosa and lamina propria with extensive areas of gland separation, enlarged Peyer's patches, edema |
| Epithelium                 | 0     | normal                                                                                                                                |
|                            | 1     | minimal: focal mucosal hyperplasia                                                                                                    |
|                            | 2     | mild: multifocal tufting of rafts of epithelial cells with increased numbers of goblet cells                                          |
|                            | 3     | moderate: multifocal to locally extensive epithelial attenuation or erosion with goblet cell hyperplasia                              |
|                            | 4     | marked: locally extensive to subtotal erosion or ulceration                                                                           |
| Glands                     | 0     | normal                                                                                                                                |
|                            | 1     | minimal: rare gland dilatation                                                                                                        |
|                            | 2     | mild: multifocal gland dilatation                                                                                                     |
|                            | 3     | moderate: multifocal gland dilatation with abscessation and occasional loss of glands                                                 |
| Depth of lesion            | 0     | none                                                                                                                                  |
|                            | 1     | mucosa                                                                                                                                |
|                            | 2     | mucosa and submucosa                                                                                                                  |
|                            | 3     | transmural                                                                                                                            |
| Extent of section affected | 0     | none                                                                                                                                  |
|                            | 1     | minimal: <10%                                                                                                                         |
|                            | 2     | mild: 10–25%                                                                                                                          |
|                            | 3     | moderate: 26–50%                                                                                                                      |
|                            | 4     | marked: >50%                                                                                                                          |

**Table S3** Determination of basic components of Maca protein

|    | Protein content<br>(g/kg) | Total sugar<br>content<br>(g/kg) | Total phenol<br>content<br>(g/ kg) | Moisture<br>content<br>(g/kg) | Ash<br>content<br>(g/kg) |
|----|---------------------------|----------------------------------|------------------------------------|-------------------------------|--------------------------|
| MP | 879.31 ± 7.12             | 45.08 ± 0.31                     | 10.02 ± 0.38                       | 62.16 ± 0.95                  | 3.66 ± 0.09              |

**Table S4** The amino acid composition and content of major individual phenols of Maca protein

| Amino acid composition | Content (mg/g) | Major individual phenols | Content ( $\mu\text{g/g}$ ) |
|------------------------|----------------|--------------------------|-----------------------------|
| EAA                    |                | Gallic acid              | 2.48                        |
| Ile                    | 6.72           | Benzoic acid             | 3.96                        |
| Leu                    | 39.24          | Catechin                 | 90.8                        |
| Met                    | 17.25          | Vanillic acid            | 6.71                        |
| Val                    | 22.28          | Caffeic acid             | nd                          |
| Phe                    | 23.11          | Syringic acid            | nd                          |
| Thr                    | 75.19          | Epicatechin              | 10.33                       |
| Lys                    | 23.35          | Coumaric acid            | 13.01                       |
| NEAA                   |                | Rutin                    | nd                          |
| Ala                    | 29.06          | Salicylic acid           | nd                          |
| Arg                    | 116.92         | Coumarin                 | 3.22                        |
| Asp                    | 48.13          | Resveratrol              | 3.74                        |
| Glu                    | 149.85         | Morin                    | nd                          |
| Gly                    | 29.17          | Quercetin                | 28.02                       |
| His                    | 15.23          | Hesperetin               | nd                          |
| Pro                    | 129.20         | Ferulic acid             | nd                          |
| Ser                    | 42.06          | Chlorogenic acid         | 12.15                       |
| Tyr                    | 19.40          | Kaempferic acid          | nd                          |
| Cys                    | 96.30          |                          |                             |
